# Supplementary material for: Sugar-Responsive Pseudopolyrotaxane Composed of Phenylboronic Acid-Modified Polyethylene Glycol and γ-Cyclodextrin
Source: MDPI journal article supplement (doi:10.3390/ma8031341), 2015-03-20
Supplement: s1 [file s1]

## Supplementary Materials

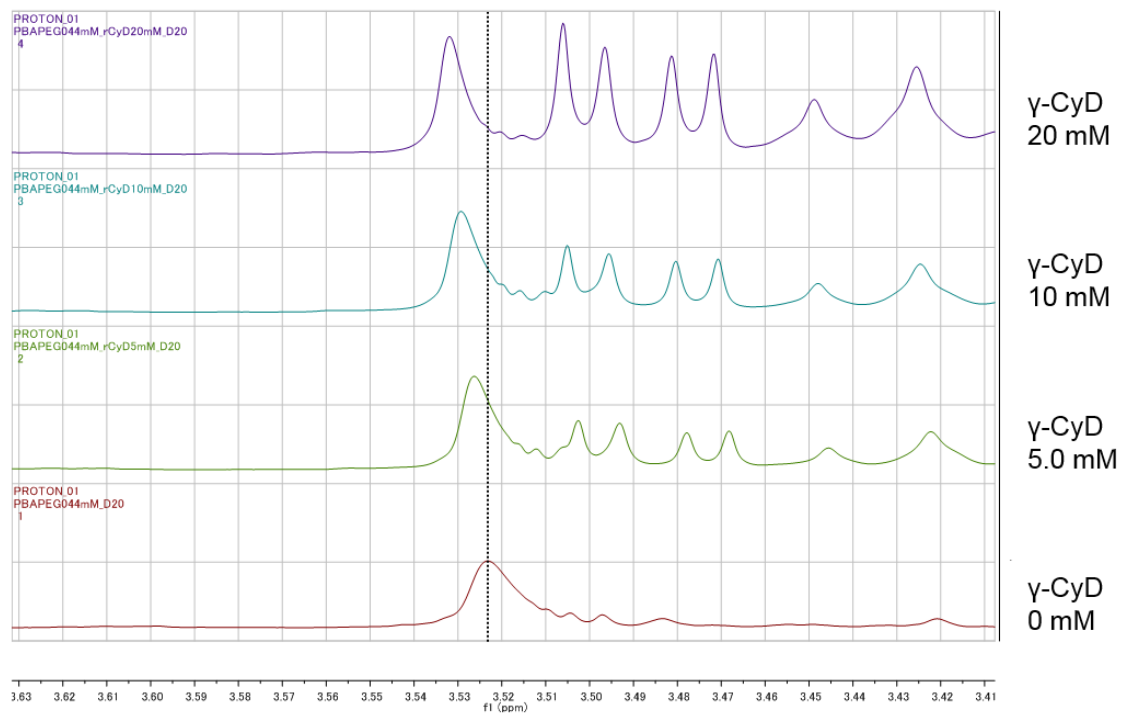

**Figure S1.** The  $^1\text{H}$  NMR spectra of PBA-PEG (0.44 mM) with various concentrations of  $\gamma$ -CyD (0, 5.0, 10, 20 mM) in  $\text{D}_2\text{O}$ .

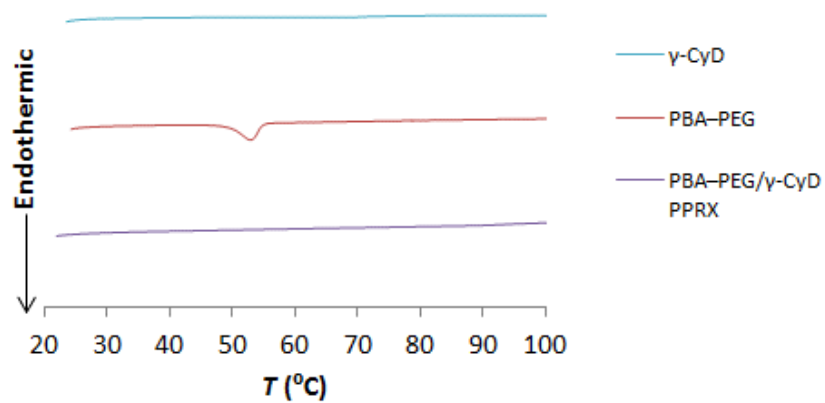

**Figure S2.** DSC thermograms of  $\gamma$ -CyD, PBA-PEG, and PBA-PEG/ $\gamma$ -CyD PPRX.
